# Supplementary material for: Patterns of linkage disequilibrium and association mapping in diploid alfalfa (M. sativa L.)
Source: PubMed Central journal article supplement (PMC3397135; doi:10.1007/s00122-012-1854-2), 2012-04-05
Supplement: 122_2012_1854_MOESM1_ESM.pdf [file 122_2012_1854_MOESM1_ESM.pdf]

# Patterns of Linkage Disequilibrium and Association Mapping in Diploid Alfalfa (*M. sativa* L.)

Muhammet Sakiroglu, Sue Sherman-Broyles, Alec Story, Kenneth J. Moore, Jeffery J. Doyle, and E. Charles Brummer

Muhammet Sakiroglu

*Department of Biology, Kafkas University, Kars, Turkey, 36100*

Sue Sherman-Broyles

*Dep. of Plant Biology Cornell Univ. Ithaca, NY 14853*

Alec Story

*Dep. of Plant Biology, Cornell Univ. Ithaca, NY 14853*

Kenneth J. Moore

*Dep. of Agronomy, Iowa State Univ., Ames, IA 50011*

Jeffery J. Doyle

*Dep. of Plant Biology, Cornell Univ. Ithaca, NY 14853*

E. Charles Brummer (Corresponding Author)

*Samuel Roberts Noble Foundation,*

*2510 Sam Noble Parkway,*

*Ardmore, OK 73401*

[ecbrummer@noble.org](mailto:ecbrummer@noble.org)

Phone: (1)580 224 6804

Fax: (1) 580 224 6802

Supplemental Table 1. List of all the accessions used in this study along with the classification of each accession, country of origin, number of individual genotypes used in this study.

| <b>PI Number</b>       | <b>Classification</b> | <b>Number of Genotypes Used</b> | <b>Country of Origin</b> |
|------------------------|-----------------------|---------------------------------|--------------------------|
| PI 179370 <sup>a</sup> | Southern caerulea     | 4                               | Turkey                   |
| PI 210367 <sup>a</sup> | Southern caerulea     | 4                               | Iran                     |
| PI 212798 <sup>a</sup> | Southern caerulea     | 4                               | Iran                     |
| PI 222198 <sup>a</sup> | Upland falcata        | 1                               | Afghanistan              |
| PI 243225              | Southern caerulea     | 4                               | Iran                     |
| PI 251690 <sup>a</sup> | Upland falcata        | 1                               | Former Soviet Union      |
| PI 251830 <sup>a</sup> | Lowland falcata       | 3                               | Austria                  |
| PI 258752 <sup>a</sup> | Upland falcata        | 2                               | Russia                   |
| PI 283640              | Southern caerulea     | 4                               | Former Soviet Union      |
| PI 299045 <sup>a</sup> | Northern caerulea     | 4                               | Russian Federation       |
| PI 299046              | Northern caerulea     | 4                               | Russian Federation       |
| PI 307395 <sup>a</sup> | Northern caerulea     | 4                               | Former Soviet Union      |
| PI 314267 <sup>a</sup> | Southern caerulea     | 4                               | Uzbekistan               |
| PI 314275              | Southern caerulea     | 4                               | Uzbekistan               |
| PI 315460              | hemicycla             | 2                               | Russian Federation       |
| PI 315462 <sup>a</sup> | Northern caerulea     | 1                               | Russian Federation       |
| PI 315466              | Northern caerulea     | 4                               | Russian Federation       |
| PI 315480              | Upland falcata        | 4                               | Russia                   |
| PI 325387 <sup>a</sup> | Upland falcata        | 2                               | Russia                   |
| PI 325396 <sup>a</sup> | Upland falcata        | 3                               | Russia                   |
| PI 325399 <sup>a</sup> | Upland falcata        | 3                               | Russia                   |
| PI 440500              | Southern caerulea     | 4                               | Kazakhstan               |
| PI 440501              | Southern caerulea     | 4                               | Kazakhstan               |
| PI 440502              | Southern caerulea     | 4                               | Kazakhstan               |
| PI 440505              | Southern caerulea     | 4                               | Kazakhstan               |
| PI 440507 <sup>a</sup> | Southern caerulea     | 4                               | Kazakhstan               |
| PI 440514              | Southern caerulea     | 2                               | Kazakhstan               |
| PI 464712              | Southern caerulea     | 4                               | Turkey                   |
| PI 464713              | Southern caerulea     | 4                               | Turkey                   |
| PI 464714 <sup>a</sup> | Southern caerulea     | 3                               | Turkey                   |
| PI 464715 <sup>a</sup> | Southern caerulea     | 4                               | Turkey                   |
| PI 464717              | Southern caerulea     | 3                               | Turkey                   |
| PI 464718              | Southern caerulea     | 4                               | Turkey                   |
| PI 464719              | Southern caerulea     | 4                               | Turkey                   |
| PI 464720              | Southern caerulea     | 1                               | Turkey                   |
| PI 464721              | Southern caerulea     | 4                               | Turkey                   |
| PI 464722 <sup>a</sup> | Southern caerulea     | 4                               | Turkey                   |
| PI 464723 <sup>a</sup> | Southern caerulea     | 2                               | Turkey                   |
| PI 464724              | Southern caerulea     | 3                               | Turkey                   |
| PI 464726 <sup>a</sup> | Southern caerulea     | 3                               | Turkey                   |
| PI 464727              | hemicycla             | 2                               | Turkey                   |
| PI 464728 <sup>a</sup> | hemicycla             | 3                               | Turkey                   |
| PI 464729              | Upland falcata        | 2                               | Turkey                   |
| PI 486205              | Upland falcata        | 3                               | Russia                   |
| PI 486206 <sup>a</sup> | Upland falcata        | 3                               | Russia                   |
| PI 486207              | Upland falcata        | 4                               | Russia                   |
| PI 494662 <sup>a</sup> | Lowland falcata       | 4                               | Romania                  |
| PI 502425 <sup>a</sup> | Northern caerulea     | 1                               | Russia                   |
| PI 502437              | Northern caerulea     | 3                               | Russian Federation       |
| PI 502438              | Upland falcata        | 1                               | Russia                   |
| PI 502447 <sup>a</sup> | Lowland falcata       | 3                               | Russia                   |

|                        |                   |   |                     |
|------------------------|-------------------|---|---------------------|
| PI 502448 <sup>a</sup> | Lowland falcata   | 4 | Russia              |
| PI 502449 <sup>a</sup> | Lowland falcata   | 4 | Former Soviet Union |
| PI 505871 <sup>a</sup> | Northern caerulea | 3 | Former Soviet Union |
| PI 538987 <sup>a</sup> | Lowland falcata   | 2 | Russia              |
| PI 577541 <sup>a</sup> | Northern caerulea | 3 | Kazakhstan          |
| PI 577543 <sup>a</sup> | hemicycla         | 4 | Georgia             |
| PI 577545              | Northern caerulea | 1 | Russian Federation  |
| PI 577546 <sup>a</sup> | Northern caerulea | 4 | Georgia             |
| PI 577547              | Northern caerulea | 4 | Georgia             |
| PI 577548 <sup>a</sup> | Northern caerulea | 4 | Russian Federation  |
| PI 577549              | Southern caerulea | 2 | Georgia             |
| PI 577551 <sup>a</sup> | Northern caerulea | 4 | Canada              |
| PI 577552              | Northern caerulea | 2 | Canada              |
| PI 577555 <sup>a</sup> | Upland falcata    | 4 | Ukraine             |
| PI 577556 <sup>a</sup> | Upland falcata    | 4 | Bulgaria            |
| PI 577558 <sup>a</sup> | Lowland falcata   | 3 | Russia              |
| PI 577564 <sup>a</sup> | Lowland falcata   | 2 | Russia              |
| PI 631546              | Upland falcata    | 3 | Russia              |
| PI 631549              | Upland falcata    | 2 | Russia              |
| PI 631556 <sup>a</sup> | Upland falcata    | 1 | Russia              |
| PI 631561 <sup>a</sup> | Lowland falcata   | 4 | Switzerland         |
| PI 631566 <sup>a</sup> | Lowland falcata   | 2 | Bulgaria            |
| PI 631568 <sup>a</sup> | Lowland falcata   | 4 | Italy               |
| PI 631571 <sup>a</sup> | Lowland falcata   | 2 | Bulgaria            |
| PI 631577 <sup>a</sup> | Lowland falcata   | 2 | Italy               |
| PI 631650 <sup>a</sup> | Lowland falcata   | 4 | Bulgaria            |
| PI 631652              | Upland falcata    | 4 | Russia              |
| PI 631654 <sup>a</sup> | Upland falcata    | 3 | Russia              |
| PI 631656 <sup>a</sup> | Upland falcata    | 3 | Russia              |
| PI 631658 <sup>a</sup> | Upland falcata    | 3 | Russia              |
| PI 631660              | Upland falcata    | 4 | Russia              |
| PI 631661              | Upland falcata    | 3 | Russia              |
| PI 631666 <sup>a</sup> | Upland falcata    | 4 | Russia              |
| PI 631667              | Upland falcata    | 4 | Russia              |
| PI 631668              | Upland falcata    | 4 | Russia              |
| PI 631689 <sup>a</sup> | Lowland falcata   | 3 | Bulgaria            |
| PI 631691 <sup>a</sup> | Lowland falcata   | 2 | Bulgaria            |
| PI 631707 <sup>a</sup> | Upland falcata    | 1 | China               |
| PI 631807 <sup>a</sup> | Lowland falcata   | 3 | Russia              |
| PI 631808              | Lowland falcata   | 1 | Russia              |
| PI 631809              | Lowland falcata   | 2 | Russia              |
| PI 631812              | Upland falcata    | 3 | Russia              |
| PI 631813              | Lowland falcata   | 4 | Russia              |
| PI 631814 <sup>a</sup> | hemicycla         | 3 | Russia              |
| PI 631816              | Upland falcata    | 4 | Russia              |
| PI 631817              | Upland falcata    | 2 | Russia              |
| PI 631818 <sup>a</sup> | Lowland falcata   | 3 | Russia              |
| PI 631829 <sup>a</sup> | Upland falcata    | 3 | Russia              |
| PI 631842              | Lowland falcata   | 1 | Sweden              |
| PI 631921 <sup>a</sup> | Northern caerulea | 4 | Russian Federation  |
| PI 631922 <sup>a</sup> | Northern caerulea | 4 | Kazakhstan          |
| PI 631924 <sup>a</sup> | Southern caerulea | 4 | Armenia             |
| PI 631925 <sup>a</sup> | Northern caerulea | 4 | Kazakhstan          |
| PI 631926 <sup>a</sup> | Northern caerulea | 4 | Russian Federation  |
| PI 634034              | Upland falcata    | 1 | Russia              |
| PI 634106 <sup>a</sup> | Upland falcata    | 2 | Ukraine             |

|                        |                   |   |                    |
|------------------------|-------------------|---|--------------------|
| PI 634119 <sup>a</sup> | hemicycla         | 4 | Kazakhstan         |
| PI 634136 <sup>a</sup> | hemicycla         | 4 | Kazakhstan         |
| PI 634174 <sup>a</sup> | hemicycla         | 4 | Kazakhstan         |
| PI 634176 <sup>a</sup> | hemicycla         | 3 | Kazakhstan         |
| PI 641380 <sup>a</sup> | Northern caerulea | 7 | Russian Federation |
| PI 641543              | Upland falcata    | 4 | Mongolia           |
| PI 641544              | Upland falcata    | 4 | Mongolia           |
| PI 641601              | hemicycla         | 4 | Kazakhstan         |
| PI 641603 <sup>a</sup> | hemicycla         | 3 | Kazakhstan         |
| PI 641606              | hemicycla         | 3 | Kazakhstan         |
| PI 641615 <sup>a</sup> | hemicycla         | 4 | Kazakhstan         |
| PI 641619 <sup>a</sup> | hemicycla         | 1 | Kazakhstan         |
| SD201 <sup>a</sup>     | Upland falcata    | 1 |                    |

---

<sup>a</sup> Accessions selected for candidate gene association study

Supplemental Table 2. Primers used for PCR, sequence and annealing temperatures. Approximate size of products and estimated size of sequence overlap between contiguous sequences.

| Amplicon     | Primer Name  | primer sequence           | annealing temp | product length | overlap 5' | overlap 3' |
|--------------|--------------|---------------------------|----------------|----------------|------------|------------|
| <b>Pal 1</b> |              |                           |                |                |            |            |
| e1f          | PalExon1F    | atggaggggaattaccaatggc    | 58             | 377            | NA         | NA         |
|              | PalExon1R    | ttctgcaaggcaccaccttgttt   |                |                |            |            |
| B            | Pal1aF       | atattaccccatgtttaccacttc  | 55             | 490            | NA         | 216        |
|              | Pal1aR       | acgatcttgtttaggcttttg     |                |                |            |            |
| C            | Pal1bF       | agcggttttgtctgaagttatgctc | 56             | 435            | 216        | 194        |
|              | Pal1bR       | gagtttaccgatcgaagcaagag   |                |                |            |            |
| D            | Pal1cF       | atggcttggctccttgattga     | 62             | 557            | 194        | 101        |
|              | Pal1cR       | cttggcttacagtgttcttgac    |                |                |            |            |
| E            | Pal1dF       | actcttggggttgatttcttcta   | 55             | 403            | 101        | NA         |
|              | Pal1dR       | tcctggcgatatcac           |                |                |            |            |
| <b>Comt</b>  |              |                           |                |                |            |            |
| 14           | 454ComtF4    | ggttcaacaggtgaaact        | 52             | 416            | NA         | NA         |
|              | 454ComtR418  | agctttccatgagcactt        |                |                |            |            |
| 15           | 454ComtF5769 | accacctaagatgcag          | 53             | 514            | NA         | 76         |
|              | 454ComtR6282 | cagcatcagcctttggaa        |                |                |            |            |
| G            | Comtcf       | atttgatgtttgtgtaggagttg   | 59             | 629            | 76         | 88         |
|              | Comtcr       | ttgtggccaggcttgaatct      |                |                |            |            |
| FQ61         | ComtFQ61F    | gctatgaagcactaccagacaatgg | 58             | 289            | 88         | NA         |
|              | ComtFQ61R    | gcaacacgccaagaacttaaac    |                |                |            |            |
| <b>F5H</b>   |              |                           |                |                |            |            |
| F            | F5HaF        | tcacgaatcctcaaaagacc      | 55             | 571            | NA         | 301        |
|              | F5HaR        | gaaatattaaagctccaacaa     |                |                |            |            |
| F5H          | F5H_F        | gacatggcgcttcgctcactac    | 58             | 456            | 301        | NA         |

|         |               |                       |          |     |     |     |
|---------|---------------|-----------------------|----------|-----|-----|-----|
|         | F5H_R         | gacatggcgttcgctcactac |          |     |     |     |
| 13      | 454F5HF2369   | cgtgatgtttggaggaac    | 54       | 612 | NA  | NA  |
|         | 454F5HR2981   | ggacacaagacacgctta    |          |     |     |     |
| CCoAoMT |               |                       |          |     |     |     |
| 7       | 454CcomtF46   | tggcaaccaacgaagatcaaa | 55       | 507 | NA  | 259 |
|         | 454CcomtR500  | tagacaccaatttccatggt  |          |     |     |     |
| 8       | 454CcomtF296  | cacagcaaaacacccatg    | TD 55-50 | 540 | 259 | 254 |
|         | 454CcomtR786  | aattacaggtagacccaa    |          |     |     |     |
| 9       | 454CcomtF580  | attcctgaagatggaaag    | TD 55-50 | 645 | 254 | 327 |
|         | 454CcomtR1079 | ccactttaacaagatcaa    |          |     |     |     |
| 10      | 454CcomtF769  | ttgggtctacctgtaatt    | TD 55-50 | 535 | 327 | NA  |
|         | 454CcomtR1272 | ttgatcctacggcagata    |          |     |     |     |

Supplemental Table 3. Diversity statistics from haplotypes determined manually from 454 reads. (Data for haplotypes inferred from genotypes reported in Table 1 in parentheses.)

| <i>M. sativa</i><br>Subspecies           | # of<br>individuals | # of<br>sequences | # of polymorphic<br>sites | # of<br>haplotypes | $\pi$           | $\theta$        |
|------------------------------------------|---------------------|-------------------|---------------------------|--------------------|-----------------|-----------------|
| <i>CCoAoMT</i> Sequence length: 1340bp   |                     |                   |                           |                    |                 |                 |
| <i>caerulea</i>                          | 27                  | 51 (54)           | 9 (11)                    | 16 (22)            | 0.0051 (0.0123) | 0.0061 (0.0114) |
| <i>falcata</i>                           | 35                  | 65 (70)           | 15 (20)                   | 23 (25)            | 0.0076 (0.0129) | 0.01113 (0.015) |
| <i>hemicycla</i>                         | 10                  | 16 (20)           | 9 (14)                    | 7 (10)             | 0.0101 (0.0127) | 0.0095 (0.0117) |
| Overall                                  | 72                  | 132 (144)         | 19 (21)                   | 32 (42)            | 0.0077 (0.0116) | 0.0124 (0.0158) |
| <i>F5H exon 1</i> Sequence length: 723bp |                     |                   |                           |                    |                 |                 |
| <i>caerulea</i>                          | 25                  | 41 (50)           | 23 (22)                   | 21 (21)            | 0.0062 (0.0062) | 0.0074 (0.0068) |
| <i>falcata</i>                           | 32                  | 54 (64)           | 38 (39)                   | 31 (32)            | 0.0084 (0.008)  | 0.0121 (0.012)  |
| <i>hemicycla</i>                         | 8                   | 15 (16)           | 16 (16)                   | 10 (9)             | 0.0071 (0.0059) | 0.0068 (0.0067) |
| Overall                                  | 65                  | 110 (130)         | 51 (52)                   | 54 (54)            | 0.0096 (0.0095) | 0.0139 (0.0137) |
| <i>F5Hexon 2</i> Sequence length: 594    |                     |                   |                           |                    |                 |                 |
| <i>caerulea</i>                          | 23                  | 37 (46)           | 42 (42)                   | 18 (18)            | 0.0159 (0.0144) | 0.0177 (0.0169) |
| <i>falcata</i>                           | 27                  | 49 (54)           | 53 (52)                   | 30 (29)            | 0.021 (0.0192)  | 0.0211 (0.0203) |
| <i>hemicycla</i>                         | 7                   | 11 (14)           | 32 (30)                   | 6 (6)              | 0.0126 (0.0093) | 0.0195 (0.0169) |
| Overall                                  | 57                  | 97 (114)          | 58 (57)                   | 46 (47)            | 0.0263 (0.0257) | 0.0206 (0.0197) |

Supplemental Table 4. Non-significant SNP-trait associations with P-values &lt; 0.05.

| Year | Gene            | SNP | N  | Marker effect |          |                       | FDR Q-value |
|------|-----------------|-----|----|---------------|----------|-----------------------|-------------|
|      |                 |     |    | <i>F</i>      | <i>P</i> | <i>R</i> <sup>2</sup> |             |
|      | <i>F5H</i> exon |     |    |               |          |                       |             |
| 2007 | 1               | 430 | 65 | 6.9959        | 0.0019   | 0.2252                | 0.1981      |
| 2007 |                 | 430 | 65 | 6.6418        | 0.0025   | 0.2093                | 0.1981      |
| 2007 |                 | 386 | 65 | 6.3806        | 0.0031   | 0.2011                | 0.1981      |
| 2007 |                 | 430 | 65 | 6.1263        | 0.0038   | 0.1947                | 0.1981      |
| 2007 |                 | 392 | 65 | 4.8933        | 0.0107   | 0.1542                | 0.4417      |
| 2007 |                 | 392 | 65 | 4.414         | 0.0163   | 0.1403                | 0.4417      |
| 2008 |                 | 175 | 65 | 4.0648        | 0.0222   | 0.1324                | 0.4417      |
| 2008 |                 | 433 | 65 | 3.8881        | 0.0258   | 0.1198                | 0.4417      |
| 2007 |                 | 175 | 65 | 3.8074        | 0.0278   | 0.1226                | 0.4417      |
| 2007 |                 | 241 | 65 | 3.7493        | 0.0292   | 0.1207                | 0.4417      |
| 2008 |                 | 50  | 65 | 3.6196        | 0.0328   | 0.1115                | 0.4417      |
| 2007 |                 | 238 | 65 | 3.5976        | 0.0334   | 0.1158                | 0.4417      |
| 2008 |                 | 241 | 65 | 3.4951        | 0.0368   | 0.1139                | 0.4417      |
| 2007 |                 | 392 | 65 | 3.4787        | 0.0372   | 0.112                 | 0.4417      |
| 2007 |                 | 386 | 65 | 3.4073        | 0.0397   | 0.0964                | 0.4417      |
| 2008 |                 | 238 | 65 | 3.3878        | 0.0405   | 0.1104                | 0.4417      |
| 2007 |                 | 386 | 65 | 3.373         | 0.0409   | 0.1072                | 0.4417      |
| 2008 |                 | 392 | 65 | 3.2626        | 0.0453   | 0.1063                | 0.4417      |
| 2007 |                 | 241 | 65 | 3.2219        | 0.0469   | 0.1015                | 0.4417      |
| 2008 |                 | 50  | 65 | 3.2217        | 0.047    | 0.105                 | 0.4417      |
| 2007 |                 | 386 | 65 | 3.2042        | 0.0476   | 0.1032                | 0.4417      |
| 2008 |                 | 433 | 65 | 3.185         | 0.0486   | 0.1038                | 0.4417      |
|      | <i>F5H</i> exon |     |    |               |          |                       |             |
| 2008 | 2               | 330 | 57 | 6.0997        | 0.0169   | 0.1087                | 0.7438      |
| 2008 |                 | 276 | 57 | 3.6069        | 0.0197   | 0.1928                | 0.7438      |
| 2007 |                 | 276 | 57 | 3.5792        | 0.0203   | 0.1981                | 0.7438      |
| 2008 |                 | 345 | 57 | 4.1075        | 0.0224   | 0.1564                | 0.7438      |
| 2007 |                 | 426 | 57 | 3.354         | 0.0262   | 0.1639                | 0.7438      |
| 2008 |                 | 165 | 57 | 3.7964        | 0.0292   | 0.1304                | 0.7438      |
| 2008 |                 | 432 | 57 | 3.7595        | 0.0301   | 0.1291                | 0.7438      |
| 2008 |                 | 522 | 57 | 3.4984        | 0.0378   | 0.1133                | 0.7438      |
| 2007 |                 | 345 | 57 | 3.3652        | 0.0425   | 0.1289                | 0.7438      |
| 2008 |                 | 330 | 57 | 4.2205        | 0.0451   | 0.0692                | 0.7438      |
| 2008 |                 | 78  | 57 | 3.2817        | 0.0458   | 0.1127                | 0.7438      |
| 2007 |                 | 222 | 57 | 3.245         | 0.0477   | 0.1018                | 0.7438      |



| Year | Gene             | SNP | N  | Marker effect |          |                       | FDR Q-value |
|------|------------------|-----|----|---------------|----------|-----------------------|-------------|
|      |                  |     |    | <i>F</i>      | <i>P</i> | <i>R</i> <sup>2</sup> |             |
|      | <i>Pal1</i> exon |     |    |               |          |                       |             |
| 2007 | 1                | 251 | 67 | 5.5373        | 0.0062   | 0.1557                | 0.3205      |
| 2008 |                  | 242 | 67 | 4.8632        | 0.011    | 0.134                 | 0.3205      |
| 2007 |                  | 305 | 67 | 4.5977        | 0.0139   | 0.1293                | 0.3205      |
| 2007 |                  | 245 | 67 | 3.0957        | 0.0153   | 0.2176                | 0.3205      |
| 2007 |                  | 254 | 67 | 3.338         | 0.0158   | 0.1877                | 0.3205      |
| 2008 |                  | 338 | 67 | 3.7322        | 0.0159   | 0.1543                | 0.3205      |
| 2007 |                  | 251 | 67 | 4.3936        | 0.0166   | 0.1378                | 0.3205      |
| 2008 |                  | 80  | 67 | 5.9422        | 0.0177   | 0.0819                | 0.3205      |
| 2007 |                  | 83  | 67 | 4.0918        | 0.0216   | 0.115                 | 0.3205      |
| 2008 |                  | 305 | 67 | 3.9492        | 0.0245   | 0.1088                | 0.3205      |
| 2007 |                  | 323 | 67 | 3.9333        | 0.0248   | 0.1233                | 0.3205      |
| 2007 |                  | 305 | 67 | 3.9088        | 0.0254   | 0.1226                | 0.3205      |
| 2008 |                  | 242 | 67 | 3.7434        | 0.0294   | 0.1052                | 0.3427      |
| 2007 |                  | 86  | 67 | 3.4187        | 0.0393   | 0.0961                | 0.3973      |
| 2008 |                  | 323 | 67 | 3.4177        | 0.0393   | 0.0942                | 0.3973      |
| 2008 |                  | 80  | 67 | 4.0133        | 0.0496   | 0.06                  | 0.4409      |

| Year | Gene             | SNP  | N  | Marker effect |          |                       | FDR Q-value |
|------|------------------|------|----|---------------|----------|-----------------------|-------------|
|      |                  |      |    | <i>F</i>      | <i>P</i> | <i>R</i> <sup>2</sup> |             |
|      | <i>Pal1</i> exon |      |    |               |          |                       |             |
| 2007 | 2                | 1222 | 71 | 5.3256        | 0.0081   | 0.1623                | 0.6616      |
| 2007 |                  | 856  | 71 | 7.4503        | 0.0082   | 0.1166                | 0.6616      |
| 2008 |                  | 73   | 71 | 5.19          | 0.0082   | 0.1408                | 0.6616      |
| 2008 |                  | 59   | 71 | 4.8919        | 0.0106   | 0.1444                | 0.6616      |
| 2008 |                  | 118  | 71 | 4.8919        | 0.0106   | 0.1444                | 0.6616      |
| 2007 |                  | 1222 | 71 | 4.9513        | 0.011    | 0.1387                | 0.6616      |
| 2008 |                  | 505  | 71 | 6.81          | 0.0112   | 0.086                 | 0.6616      |
| 2008 |                  | 253  | 71 | 4.7901        | 0.0116   | 0.1299                | 0.6616      |
| 2007 |                  | 1156 | 71 | 4.8066        | 0.0121   | 0.1509                | 0.6616      |
| 2008 |                  | 49   | 71 | 4.6759        | 0.0128   | 0.138                 | 0.6616      |
| 2007 |                  | 1249 | 71 | 4.6659        | 0.0138   | 0.147                 | 0.6616      |
| 2007 |                  | 1219 | 71 | 4.6574        | 0.0139   | 0.1733                | 0.6616      |
| 2008 |                  | 79   | 71 | 4.5846        | 0.0139   | 0.1244                | 0.6616      |
| 2007 |                  | 1348 | 71 | 4.6654        | 0.014    | 0.1307                | 0.6616      |
| 2007 |                  | 1156 | 71 | 4.5313        | 0.0153   | 0.1563                | 0.6616      |
| 2007 |                  | 1324 | 71 | 4.4545        | 0.0165   | 0.1404                | 0.6616      |
| 2008 |                  | 253  | 71 | 4.3828        | 0.0166   | 0.1156                | 0.6616      |
| 2008 |                  | 328  | 71 | 4.3486        | 0.0169   | 0.1152                | 0.6616      |
| 2007 |                  | 1222 | 71 | 4.4286        | 0.0171   | 0.1364                | 0.6616      |
| 2008 |                  | 748  | 71 | 4.2235        | 0.0191   | 0.1135                | 0.6616      |
| 2007 |                  | 856  | 71 | 5.7171        | 0.0198   | 0.0904                | 0.6616      |
| 2007 |                  | 85   | 71 | 4.1562        | 0.0204   | 0.1054                | 0.6616      |
| 2008 |                  | 337  | 71 | 4.08          | 0.0214   | 0.1066                | 0.6616      |
| 2007 |                  | 826  | 71 | 5.5085        | 0.0222   | 0.0882                | 0.6616      |
| 2008 |                  | 826  | 71 | 5.3819        | 0.0236   | 0.0851                | 0.6616      |
| 2007 |                  | 433  | 71 | 3.9557        | 0.0241   | 0.1167                | 0.6616      |
| 2008 |                  | 895  | 71 | 3.6419        | 0.032    | 0.1151                | 0.6616      |
| 2007 |                  | 49   | 71 | 3.621         | 0.0326   | 0.1095                | 0.6616      |
| 2008 |                  | 1156 | 71 | 3.6572        | 0.0327   | 0.1124                | 0.6616      |
| 2007 |                  | 772  | 71 | 3.6146        | 0.0327   | 0.1164                | 0.6616      |
| 2007 |                  | 43   | 71 | 3.5931        | 0.0334   | 0.1087                | 0.6616      |
| 2008 |                  | 895  | 71 | 3.506         | 0.0361   | 0.1022                | 0.6616      |
| 2008 |                  | 1348 | 71 | 3.5445        | 0.0362   | 0.1154                | 0.6616      |
| 2008 |                  | 73   | 71 | 3.4751        | 0.0371   | 0.0991                | 0.6616      |
| 2008 |                  | 328  | 71 | 3.4641        | 0.0372   | 0.0874                | 0.6616      |
| 2007 |                  | 251  | 71 | 4.5254        | 0.0373   | 0.0685                | 0.6616      |
| 2007 |                  | 778  | 71 | 3.4461        | 0.0383   | 0.0816                | 0.6616      |

| Year | Gene | SNP  | N  | Marker effect |        |        | FDR Q-value |
|------|------|------|----|---------------|--------|--------|-------------|
|      |      |      |    | F             | P      | R2     |             |
| 2008 |      | 1084 | 71 | 3.0041        | 0.0388 | 0.1545 | 0.6616      |
| 2008 |      | 73   | 71 | 3.3935        | 0.0399 | 0.0933 | 0.6616      |
| 2008 |      | 79   | 71 | 3.3201        | 0.0427 | 0.0947 | 0.6616      |
| 2008 |      | 59   | 71 | 3.3167        | 0.0428 | 0.0875 | 0.6616      |
| 2008 |      | 118  | 71 | 3.3167        | 0.0428 | 0.0875 | 0.6616      |
| 2008 |      | 1348 | 71 | 3.3345        | 0.0436 | 0.1256 | 0.6616      |
| 2007 |      | 1084 | 71 | 2.881         | 0.0448 | 0.1608 | 0.6616      |
| 2008 |      | 769  | 71 | 3.2376        | 0.046  | 0.0938 | 0.6616      |
| 2008 |      | 253  | 71 | 3.2211        | 0.0467 | 0.0886 | 0.6616      |
| 2007 |      | 1324 | 71 | 3.2553        | 0.0467 | 0.1124 | 0.6616      |
| 2007 |      | 85   | 71 | 3.2157        | 0.0469 | 0.0973 | 0.6616      |
| 2008 |      | 328  | 71 | 3.195         | 0.0475 | 0.0859 | 0.6616      |
| 2008 |      | 1348 | 71 | 3.2002        | 0.0492 | 0.1143 | 0.6616      |
| 2008 |      | 61   | 71 | 3.1475        | 0.0499 | 0.0798 | 0.6616      |

| Year | Gene             | SNP  | N  | Marker effect |          |                       | FDR Q-value |
|------|------------------|------|----|---------------|----------|-----------------------|-------------|
|      |                  |      |    | <i>F</i>      | <i>P</i> | <i>R</i> <sup>2</sup> |             |
|      | <i>Comt</i> exon |      |    |               |          |                       |             |
| 2007 | 1                | 300  | 69 | 4.8138        | 0.0113   | 0.1327                | 0.6408      |
| 2007 |                  | 275  | 69 | 2.7586        | 0.05     | 0.1003                | 0.6408      |
| 2007 | <i>Comt</i> 2    | 583  | 69 | 7.8841        | 0.0072   | 0.1541                | 0.8656      |
| 2008 |                  | 968  | 69 | 5.2001        | 0.0082   | 0.1441                | 0.8656      |
| 2007 |                  | 675  | 69 | 4.5999        | 0.0151   | 0.1732                | 0.8656      |
| 2008 |                  | 1160 | 69 | 5.4606        | 0.0231   | 0.0896                | 0.8656      |
| 2008 |                  | 675  | 69 | 4.0847        | 0.0233   | 0.1305                | 0.8656      |
| 2008 |                  | 675  | 69 | 3.9153        | 0.0269   | 0.1428                | 0.8656      |
| 2008 |                  | 1037 | 69 | 3.8036        | 0.0277   | 0.1049                | 0.8656      |
| 2008 |                  | 974  | 69 | 3.2488        | 0.0278   | 0.1341                | 0.8656      |
| 2007 |                  | 923  | 69 | 4.7152        | 0.035    | 0.0921                | 0.8656      |
| 2008 |                  | 877  | 69 | 3.487         | 0.0389   | 0.115                 | 0.8656      |
| 2008 |                  | 689  | 69 | 3.0299        | 0.039    | 0.1768                | 0.8656      |
| 2008 |                  | 748  | 69 | 3.4726        | 0.0394   | 0.1145                | 0.8656      |
| 2008 |                  | 1193 | 69 | 3.3667        | 0.0419   | 0.0982                | 0.8656      |
| 2008 |                  | 550  | 69 | 3.3935        | 0.0422   | 0.1084                | 0.8656      |
| 2007 |                  | 675  | 69 | 3.3696        | 0.0431   | 0.1266                | 0.8656      |
| 2008 |                  | 675  | 69 | 3.2903        | 0.0462   | 0.1085                | 0.8656      |
| 2008 |                  | 1037 | 69 | 3.2181        | 0.0468   | 0.0979                | 0.8656      |
| 2008 |                  | 331  | 69 | 3.1975        | 0.0477   | 0.0864                | 0.8656      |
|      | <i>Ccomt</i>     |      |    |               |          |                       |             |
| 2007 |                  | 793  | 71 | 8.1196        | 7.20E-04 | 0.1437                | 0.0597      |
| 2007 |                  | 793  | 71 | 8.1194        | 7.20E-04 | 0.156                 | 0.0597      |
| 2007 |                  | 111  | 71 | 7.9494        | 9.01E-04 | 0.2151                | 0.0664      |
| 2008 |                  | 111  | 71 | 7.2671        | 0.0016   | 0.202                 | 0.101       |
| 2008 |                  | 538  | 71 | 7.0863        | 0.0017   | 0.1507                | 0.101       |
| 2008 |                  | 237  | 71 | 6.9286        | 0.002    | 0.1601                | 0.1054      |
| 2007 |                  | 793  | 71 | 6.8164        | 0.0021   | 0.1469                | 0.1057      |
| 2007 |                  | 113  | 71 | 4.826         | 0.0047   | 0.1939                | 0.2208      |

Supplemental Figure 1. Linkage disequilibrium for *F5H* exon 2, overall and by subspecies.

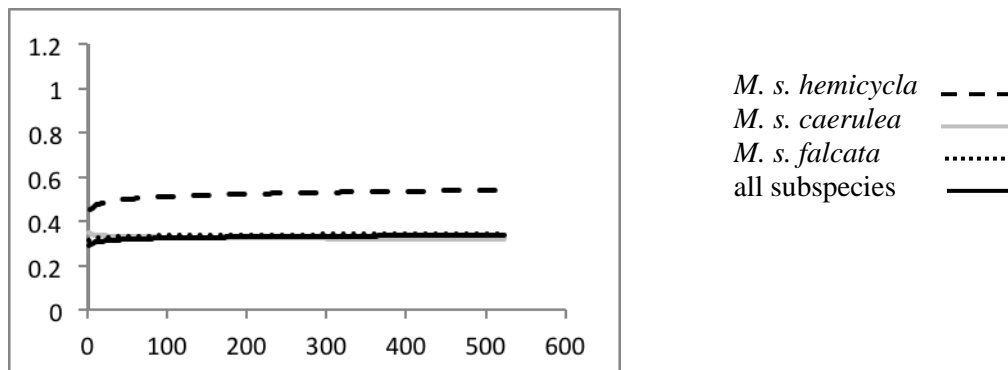

Supplemental Figure 2. Quantile-Quantile (QQ) plots to visualize the observed MLM  $P$ -value versus expected  $P$ -value distribution for *CCoAoMT* and *F5H* exon 2

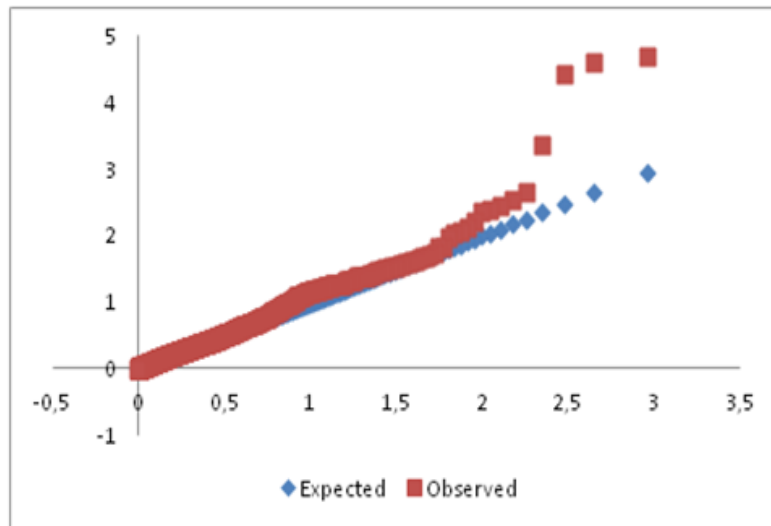

*CcoAoMT*

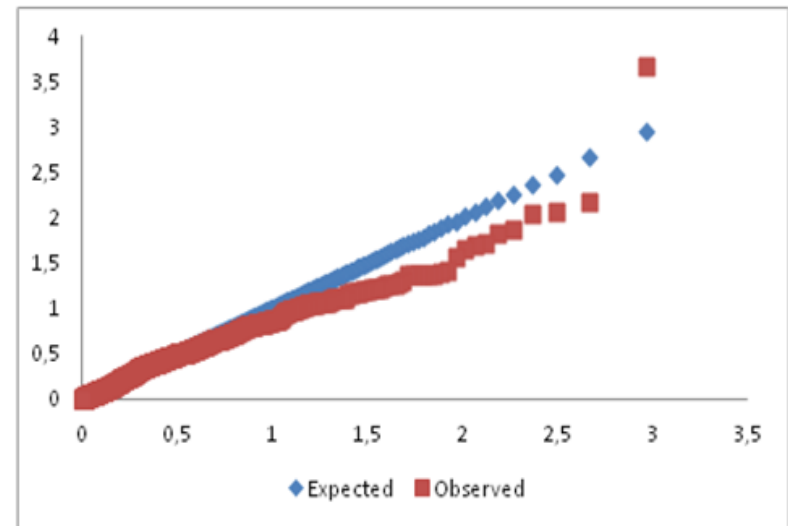

*F5H* exon 2
